# Supplementary material for: Effectiveness of the NAMI Homefront Program for Military and Veteran Families: In-Person and Online Benefits
Source: Atypon-hosted journal article supplement (doi:10.1176/appi.ps.201800573), 2019-07-05
Supplement: appi.ps.201800573.ds001.pdf [file appi.ps.201800573.ds001.pdf]

**Online Supplement - The Effectiveness of the NAMI Homefront Program for Military and Veteran Families: In-person and Online Benefits**

**Description of NAMI Homefront Class Formats and Sizes:** The online program is delivered as a live webinar, with teachers using PowerPoint to present material along with lecture, while in-person teachers present the material verbally using white boards or flip charts and lecture. The curriculum content is identical in both formats. The manuals have built-in stopping points for group discussion; online participants may use a microphone to speak, or type in a communal chatbox which teachers narrate. For introductions and sharing personal stories, online teachers and participants use webcams. Mirroring the in-person format, the online platform also allows splitting into small groups to facilitate participation in skills workshops. The suggested class size is 12-14 participants. Online classes typically reach capacity, while in-person classes have been known to vary, ranging from groups of four to 18, depending on location (e.g. rural states).

**Participant States:** In-person classes spanned 15 states in all regions of the U.S. (West (AZ, CA, OR); Midwest (IA, IL, MO, NE, OH); Northeast (NY); South (DE, GA, MD, OK, TN, TX)). Online participants resided across 22 states in all regions of the U.S. (West (CA, MT, OR, UT, WA); Midwest (IA, IL, KS, MI, OH, WI); Northeast (CT, MA, ME, NJ, NY, RI); South (FL, GA, NC, SC, TX)).

**Approximate Study Enrollment Rate:** We do not have the total number of class participants who were actually offered study participation; however, the average class sizes for in-person and online classes were 8 and 12 participants respectively. If we assume that all participants were offered participation, we estimate a study enrollment rate of approximately 36% for in-person programs, and

50% for online programs. We do not have information on the characteristics of program participants who took the class but did not enroll in the study.

**Comparison of NAMI Homefront to FTF intervention on demographics and baseline scores:** See the tables on the following pages for comparison of demographics and baseline measures. NAMI Homefront participants were significantly more female, more likely to be a spouse (rather than a parent), and less likely to be white in comparison to participants in FTF (3). At baseline, participants in NAMI Homefront had significantly greater community-focused empowerment, less worry (subjective burden) and more positive experience of caregiving (all ECI scales used), but worse acceptance (coping), worse psychological distress across all subscales, and worse family functioning (both general and problem-solving scales) than FTF participants (3, 5).

**Comparison of demographic characteristics for NAMI Homefront and FTF intervention participants**

| Characteristic <sup>a</sup>                    | NAMI Homefront Baseline (N=119) |    | FTF Baseline (N=133) <sup>b</sup> |    | T Value             | df        | P Value        |
|------------------------------------------------|---------------------------------|----|-----------------------------------|----|---------------------|-----------|----------------|
|                                                | N                               | %  | N                                 | %  |                     |           |                |
| Age (M±SD)                                     | 50.8±13.6                       |    | 52.6±10.2                         |    | 1.196               | 250       | 0.232          |
|                                                |                                 |    |                                   |    | <b>Chi-square</b>   | <b>df</b> | <b>P Value</b> |
| Gender                                         |                                 |    |                                   |    | 10.746              | 1         | 0.001          |
| Male                                           | 11                              | 9  | 33                                | 25 |                     |           |                |
| Female                                         | 108                             | 91 | 99                                | 75 |                     |           |                |
| Race/Ethnicity <sup>c</sup>                    |                                 |    |                                   |    | 4.141               | 1         | 0.041          |
| White or Caucasian                             | 64                              | 57 | 92                                | 70 |                     |           |                |
| Non-White or Caucasian                         | 48                              | 43 | 40                                | 30 |                     |           |                |
| Education <sup>d</sup>                         |                                 |    |                                   |    | 1.518               | 1         | 0.217          |
| Less than college graduate                     | 32                              | 27 | 46                                | 35 |                     |           |                |
| College graduate or higher                     | 85                              | 73 | 87                                | 65 |                     |           |                |
| Relationship to ill family member <sup>e</sup> |                                 |    |                                   |    | 53.833 <sup>f</sup> | 2         | <0.001         |
| Parent                                         | 23                              | 20 | 75                                | 56 |                     |           |                |
| Spouse/partner                                 | 64                              | 54 | 18                                | 14 |                     |           |                |
| Other                                          | 31                              | 26 | 40                                | 30 |                     |           |                |

<sup>a</sup> Income was excluded from analysis because data were missing for 24 (20%) of NAMI Homefront participants. Diagnoses were excluded from analysis because FTF reported mutually exclusive groups and NAMI Homefront did not; additionally there was a lack of overlapping groups (e.g. no PTSD in FTF group).

<sup>b</sup> Data retrieved from Dixon et al. (3)

<sup>c</sup> n=6 missing for NAMI Homefront; n=1 missing for FTF

<sup>d</sup> n=2 missing from NAMI Homefront

<sup>e</sup> n=1 missing from NAMI Homefront

<sup>f</sup> parent\*spouse post-hoc: T=53.255; df=1; p<0.001

<sup>f</sup> parent\*other post-hoc: T=7.720; df=1; p<0.01

<sup>f</sup> spouse\*other post-hoc: T=19.115; df=1; p<0.001

**Comparison of baseline outcome scores for NAMI Homefront and FTF intervention participants**

| Measure                    | Items              | Scoring Range      | NAMI Homefront Baseline (N=119) |      | FTF Baseline (N=133) <sup>a</sup> |      | T Value | df  | P Value |
|----------------------------|--------------------|--------------------|---------------------------------|------|-----------------------------------|------|---------|-----|---------|
|                            |                    |                    | M                               | SD   | M                                 | SD   |         |     |         |
| Empowerment                |                    |                    |                                 |      |                                   |      |         |     |         |
| Family Empowerment Scale   |                    |                    |                                 |      |                                   |      |         |     |         |
| Family subscale            | 12                 | 1-5 <sup>b</sup>   | 3.4                             | 0.8  | 3.4                               | 0.6  | 0       | 250 | 1.000   |
| Service system subscale    | 10                 | 1-5 <sup>b</sup>   | 3.2                             | 0.9  | 3.2                               | 0.8  | 0       | 250 | 1.000   |
| Community subscale         | 12                 | 1-5 <sup>b</sup>   | 2.9                             | 1.0  | 2.6                               | 0.7  | 2.781   | 250 | 0.005   |
| Knowledge test             | 16-20 <sup>c</sup> | 0-100 <sup>b</sup> | 57.4                            | 25.0 | 60.6                              | 16.8 | 1.203   | 250 | 0.229   |
| Subjective burden          |                    |                    |                                 |      |                                   |      |         |     |         |
| FEIS <sup>d</sup>          |                    |                    |                                 |      |                                   |      |         |     |         |
| Worry subscale             | 7                  | 0-4 <sup>e</sup>   | 2.4                             | 0.9  | 2.7                               | 0.8  | 2.801   | 250 | 0.005   |
| Displeasure subscale       | 7                  | 1-5 <sup>e</sup>   | 2.7                             | 1.1  | 2.8                               | 0.8  | 0.831   | 250 | 0.406   |
| Coping                     |                    |                    |                                 |      |                                   |      |         |     |         |
| Brief COPE Inventory       |                    |                    |                                 |      |                                   |      |         |     |         |
| Acceptance subscale        | 4                  | 4-16 <sup>b</sup>  | 12.3                            | 3.2  | 13.0                              | 2.3  | 2.008   | 250 | 0.045   |
| Psychological distress     |                    |                    |                                 |      |                                   |      |         |     |         |
| BSI (T score) <sup>f</sup> |                    |                    |                                 |      |                                   |      |         |     |         |
| Global severity index      | 18                 | 33-81 <sup>e</sup> | 57.0                            | 12.0 | 51.8                              | 9.0  | 3.916   | 250 | <0.001  |
| Somatization scale         | 6                  | 33-81 <sup>e</sup> | 53.3                            | 11.1 | 48.2                              | 8.2  | 4.176   | 250 | <0.001  |
| Depression scale           | 6                  | 33-81 <sup>e</sup> | 58.1                            | 11.1 | 52.0                              | 9.2  | 4.766   | 250 | <0.001  |
| Anxiety scale              | 6                  | 33-81 <sup>e</sup> | 56.5                            | 12.1 | 52.5                              | 9.1  | 2.984   | 250 | 0.003   |
| Family functioning         |                    |                    |                                 |      |                                   |      |         |     |         |
| Family Assessment Device   |                    |                    |                                 |      |                                   |      |         |     |         |
| General functioning scale  | 12                 | 12-48 <sup>e</sup> | 28.6                            | 7.1  | 24.8                              | 6.6  | 4.402   | 250 | <0.001  |
| Problem-solving scale      | 6                  | 6-24 <sup>e</sup>  | 14.4                            | 3.5  | 13.0                              | 3.0  | 3.418   | 250 | <0.001  |

|                                       |    |                   |      |     |      |     |       |                  |        |
|---------------------------------------|----|-------------------|------|-----|------|-----|-------|------------------|--------|
| Caregiving experience                 |    |                   |      |     |      |     |       |                  |        |
| ECI <sup>g</sup>                      |    |                   |      |     |      |     |       |                  |        |
| Positive personal experience subscale | 8  | 0-32 <sup>b</sup> | 20.5 | 5.4 | 17.8 | 5.9 | 3.908 | 275 <sup>h</sup> | <0.001 |
| Good aspect of relationship subscale  | 6  | 0-24 <sup>b</sup> | 14.6 | 5.4 | 13.2 | 4.5 | 2.350 | 275 <sup>h</sup> | 0.019  |
| Positive scale (both above)           | 14 | 0-56 <sup>b</sup> | 35.2 | 9.6 | 31.0 | 9.1 | 3.713 | 275 <sup>h</sup> | <0.001 |

<sup>a</sup> Data retrieved from Dixon et al. (3), with the exception of ECI scales (see <sup>g</sup> below)

<sup>b</sup> The higher the score, the better the outcome (better knowledge, better coping)

<sup>c</sup> The NAMI Homefront knowledge measure was 16-items while the FTF knowledge measure was 20-items

<sup>d</sup> FEIS, Family Experiences Interview Schedule

<sup>e</sup> The higher the score, the worse the outcome (more worry, more depression symptoms, worse functioning)

<sup>f</sup> BSI, Brief Symptom Inventory

<sup>g</sup> ECI, Experience of Caregiving Inventory

<sup>h</sup> The FTF results for ECI were obtained from Toohey et al. (5) which included all FTF individuals with a baseline assessment (N=158). The remainder of the results in this table were obtained from Dixon et al. (3) which did not include ECI scales, and only included FTF individuals who completed a follow-up assessment (N=133).
